# Supplementary material for: Excitatory neurons are more disinhibited than inhibitory neurons by chloride dysregulation in the spinal dorsal horn
Source: eLife. 2019 Nov 19;8:e49753. doi: 10.7554/eLife.49753 (PMC6887484; doi:10.7554/eLife.49753)
Supplement: Figure 1—source data 1. [file elife-49753-fig1-data1.xlsx]

## Sheet: Sheet1
	RF center				RF surround					Center		Firing rate (spk/s)		Rate * Area				Surround		Firing rate (spk/s)		Rate * Area
	baseline	10 min post	30 min post		baseline	10 min post	30 min post			Area (mm^2)		control	KCC2 block	Baseline	KCC2 block	difference		Area (mm^2)		control	KCC2 block	Baseline	KCC2 block	difference
evoked firing rate	6.4762	15.1429	19.7619		0.5238	0.4762	13.1905			95.3775		6.47619	9.7619	617.683	931.066	313.383		244.92		0.24737	2.08421	60.5859	510.465	449.879
(spk/s)	3.7143	1.2857	6.9524		0.5263	0.3158	7.2632			57.6975		3.71429	6.95238	214.305	401.135	186.83		111.863		0.42857	2.18571	47.9409	244.499	196.558
	2.7619	10.7143	13.8571		0.8053	6.3368	4.7737			29.4375		4.89474	9.31579	144.089	274.234	130.145		88.3125		0.42857	18.4286	37.8481	1627.47	1589.63
	4.8947	11.4737	9.3158		0.3632	3.1263	2.8211			75.36		3.16667	6.09091	238.64	459.011	220.371		94.2		0.80952	10.2381	76.2568	964.429	888.172
	20.1579	57.0526	32.5263		0.2474	1.1684	2.0842			57.6975		4.27778	4	246.817	230.79	-16.0272		111.863		0	2.25	0	251.691	251.691
	23.3158	65.3684	59.2632		0.8095	1.1905	1.1429			29.4375		4.35	7.2	128.053	211.95	83.8969		88.3125		0.95	9.3	83.8969	821.306	737.409
	5.4211	36.6316	74.8421		1.9048	4.2857	9.0952			29.4375		5.65	11.55	166.322	340.003	173.681		235.5		1.25	24.6	294.375	5793.3	5498.93
	3.1667	4.8947	6.0909		0.4286	1.6143	2.1857			57.6975		3.75	5.05	216.366	291.372	75.0067		141.3		0.94	5.5	132.822	777.15	644.328
	1.3333	6.0526	6.0909		0.4286	2.5714	18.4286			29.4375		3.05	6.8	89.7844	200.175	110.391		140.123		1.4	4.95	196.171	693.606	497.435
	4.2778	6.8947	4		0.8095	1.2857	10.2381			57.6975		3.35	3.85	193.287	222.135	28.8488		173.093		0.1	1.2	17.3093	207.711	190.402
	10.7647	18.0737	12.7391		0.4	0	-0.25			117.75		9.45	26.2	1112.74	3085.05	1972.31		222.548		0.1	2.7	22.2548	600.878	578.624
	2.8412	4.2105	1.7501		0	0	0			42.39		12.1	23	512.919	974.97	462.051		127.17		0.45	3.15	57.2265	400.585	343.359
	12.1059	15.6053	26.3208		0	2.25	2.25			18.84		3.4	5.25	64.056	98.91	34.854		180.157		0.5	4.7	90.0787	846.74	756.662
	1.9471	14.4579	6.3646		1.95	9.3	9.3			46.735		4.71429	6.09524	220.322	284.861	64.5386		369.441		0.42857	2.8571	158.331	1055.53	897.198
	38.0588	47.2526	38.1483		1.95	24.6	24.6			56.0608		4.27778	5.4	239.816	302.728	62.9125		223.195		1	5.25	223.195	1171.77	948.579
	18.0118	68.4737	39.447		1.6	37.05	37.05			52.858		3.35	3.85	177.074	203.503	26.429		275.535		0	3.2	0	881.712	881.712
	4.35	7.2	7.2		0.4	5	5.5			14.4244		4.35	7.2	62.746	103.855	41.1095		200.175		0.45	6	90.0788	1201.05	1110.97
	5.65	11.55	11.55		0.2	1.5	0.95			23.8444		5.65	11.55	134.721	275.403	140.682		241.093		0.25	14.6	60.2733	3519.96	3459.69
	3.75	5.05	5.05		0	1	0.1			29.4375		3.05	6.8	89.7844	200.175	110.391		140.123		1.4	4.95	196.171	693.606	497.435
	3.05	6.8	6.8		1.6	2.5	0.15			49.7494		9.45	26.2	470.132	1303.43	833.302		233.145		0.1	2.7	23.3145	629.492	606.177
	3.35	3.85	3.85		0.15	2	0.1			42.39		12.1	23	512.919	974.97	462.051		127.17		0.45	3.15	57.2265	400.585	343.359
	13.4	25.45	25.45		1.4	8.45	4.95			18.84		4.35	7.2	81.954	135.648	53.694		98.91		0.45	6	44.5095	593.46	548.951
	9.45	26.2	26.2		0.1	2.95	1.2
	24.55	40	40		0.1	4.9	2.7
	12.1	23	23		0.45	6.2	3.15
	3.4	10.55	5.25		0.05	1.45	0.3
	3.4	5.25	16.25		2	6.65	5.25
	9.45	16.25	1.8		0.2	5.2	2
	1.4	1.8	3.65		0.35	6.888	0.95
	1.3	5.05	6.55		0.2	1.15	0.25
	1.85	3.75	3.75		0.5	6.25	4.7
	4.35	7.2	7.2		2.45	8.15	6
Data for Fig 1C										Data for Fig 1E
