# Supplementary material for: Excitatory neurons are more disinhibited than inhibitory neurons by chloride dysregulation in the spinal dorsal horn
Source: eLife. 2019 Nov 19;8:e49753. doi: 10.7554/eLife.49753 (PMC6887484; doi:10.7554/eLife.49753)
Supplement: Figure 2—source data 1. [file elife-49753-fig2-data1.xlsx]

## Sheet: Sheet1
	Adapting	Non-adapting			Adapting				Non-adapting					Adapting	Non-adapting
adaptation tau	494.389	110.509			Baseline	KCC2 block			Baseline	KCC2 block			delta drive (RF surround)/delta drive (RF center)	1.0521	4.0304
(ms)	575.242	155.395		RF area	57.6975	111.862	DIOA		75.36	94.2	DIOA			12.2143	8.5903
	577.968	88.4956		(mm^2)	29.4375	88.3125	DIOA		57.6975	141.3	DIOA			8.7895	6.6
	615.726	146.767			29.4375	235.5	DIOA		57.6975	173.093	DIOA			31.661	0.2934
	667.958	327.322			29.4375	140.123	DIOA		117.75	222.548	DIOA			1.0766
	465.289	185.667			42.39	127.17	DIOA		57.6975	230.79	VU			21.7095
	429.313	169.256			18.84	180.157	DIOA		57.6975	230.79	VU			13.9017
	513.031	285.323			46.735	369.441	DIOA		117.75	340.298	VU			15.0778
	518.753	303.095			56.0608	223.195	DIOA		29.4375	117.75	VU			33.3615
	635.809	281.128			52.858	275.535	DIOA							27.0247
	389.59	166.304			14.4244	200.175	DIOA							24.5923
	464.447	327.987			23.8444	241.093	DIOA							3.1104
	390.442				29.4375	140.123	DIOA
					57.6975	169.56	VU
					57.6975	169.56	VU
					117.75	340.298	VU
					117.75	340.298	VU
					117.75	340.298	VU
					29.4375	117.75	VU
					29.4375	117.75	VU
					29.4375	117.75	VU
					29.4375	117.75	VU
					29.4375	117.75	VU
Data for Fig. 2B inset				Data for Fig. 2C									Data for Fig. 2D
