# Supplementary material for: Excitatory neurons are more disinhibited than inhibitory neurons by chloride dysregulation in the spinal dorsal horn
Source: eLife. 2019 Nov 19;8:e49753. doi: 10.7554/eLife.49753 (PMC6887484; doi:10.7554/eLife.49753)
Supplement: Figure 3—source data 1. [file elife-49753-fig3-data1.xlsx]

## Sheet: Sheet1
		count (at baseline)			additional (after KCC2 block)
depth (microns)		Adapting	Non-adapting		Adapting	Non-adapting
0		0	0		0	0
50		7	0		1	0
100		14	0		6	1
150		23	5		13	0
200		11	17		2	4
250		3	8		0	0
300		4	8		0	0
350		2	3		0	0
400		0	0		0	0
Data for Fig. 3C
