# Supplementary material for: Excitatory neurons are more disinhibited than inhibitory neurons by chloride dysregulation in the spinal dorsal horn
Source: eLife. 2019 Nov 19;8:e49753. doi: 10.7554/eLife.49753 (PMC6887484; doi:10.7554/eLife.49753)
Supplement: Figure 4—source data 1. [file elife-49753-fig4-data1.xlsx]

## Sheet: Sheet1
	Adapting			Non-adapting				Adapting			Non-adapting
	baseline	KCC2 block		baseline	KCC2 block		spontaneous firing rate	baseline	KCC2 block		baseline	KCC2 block
firing rate slope	0.105	1.7		0.49	0.8806		(spk/s)	1.6	1.5		0.6	4.7
(spk/s/g)	0.2125	1.955		0.245	0.4211			0	0		0	10.5
	2.695	4.5175		0.455	3.0313			2	0.8		4.1	16
	1.39	3.1875		0.835	1.725			0	0		13	39.3
	0.3775	0.885		0.88	2.6725			1.1	0.7		0.3	0.5
	0.895	0.9475		1.0875	1.615			0.1	0.3		1.8	0
	0.025	0.67		0.33	0.4975			0	0		12.2	18.1
	0.025	0.1075		0.99	2.25			0	0.1		14.6	34.3
	0.23	0.245		0.7775	2.6			0.8	0.1		0.8	1.6
	0.035	0.2		0.44	1.5225			0.1	0.1		1.3	4.2
	0.3606	4.2		0.6692	1.0317			0	0.1		20.2	21.2
	0.4942	3.345		0.1502	1.6748			0	0		13.2	17.1
	0.3033	1.1825		0.5834	2.9883			0	0		11.2	14.2
	0.9936	4.575		0.136	1.4116			0.1	0		9.25	33.7
	0.2289	4.5						0	0		7.75	26.6
	0.0202	0.2125						0	0.1		2.85	22.8
	0.0634	0.5025						2	1.7		0.5	29.8
	0.0482	0.3825						0.2	0.3		0	6.8
	0.0542	0.3125						1.1	2.3		0.9	10.5
								0.5	1.5		5.5	3.3
data for Fig. 4B								0	0.1
								1.7	1
								0	0
								0.3	0.3
								0.2	0.1
								0	0.1
								0	0
								2.05	3.35
								0.4	11
								0.45	0.3
								0.1	0.05
								0.35	1.3
								0.5	0.3
								0	0.5
								0.2	0
								0.1	0
								0	0.5
								0	0.2
								0.5	0.2
							data for Fig. 4C
