# Supplementary material for: Excitatory neurons are more disinhibited than inhibitory neurons by chloride dysregulation in the spinal dorsal horn
Source: eLife. 2019 Nov 19;8:e49753. doi: 10.7554/eLife.49753 (PMC6887484; doi:10.7554/eLife.49753)
Supplement: Figure 5—source data 1. [file elife-49753-fig5-data1.xlsx]

## Sheet: Sheet1
	Exc cells	Inh cells
shift in Ecl	8	5
(mV)	12	16
	7	17
	8	2
	-2	4
	4	4
	26
	2
