# Supplementary material for: Excitatory neurons are more disinhibited than inhibitory neurons by chloride dysregulation in the spinal dorsal horn
Source: eLife. 2019 Nov 19;8:e49753. doi: 10.7554/eLife.49753 (PMC6887484; doi:10.7554/eLife.49753)
Supplement: Figure 6—source data 1. [file elife-49753-fig6-data1.xlsx]

## Sheet: Sheet1
	alpha = 0.5 (simulates stim to RF surround)							alpha = 2 (simulates stim to RF center)
	Exc cells			Inh cells				Exc cells			Inh cells
	Einh=-70	Einh=-45		Einh=-70	Einh=-45			Einh=-70	Einh=-45		Einh=-70	Einh=-45
slope	0.6	4.3		2.1	5.7		slope	5.2	7		6.5	4.4
(spk/s/nS)	1.9	3.7		2.8	6.9		(spk/s/nS)	6.4	6.8		4.4	7.3
	0.7	7.3		0.4	4.1			7.5	7.9		0.7	2.3
	1.2	14.9		4.2	12.2			2.3	6.8		7.8	10.9
	1.7	7.5		1.9	4			7.7	10.2		6	5.6
	2.5	8		0.9	3.1			8.6	9.4		3.3	3.1
				4.8	3.8						11.6	13.8
				1.3	4.3						4.4	7
				0.2	0.2						4.5	4
y-int	2.8	2.2		3.3	8.6		y-int	2.6	2		3.8	6.6
(spk/s)	1.8	4.7		6.7	11.8		(spk/s)	1.7	0.9		6.4	6.8
	0.9	-0.4		1	3.7			2.3	2.4		1.7	1.8
	0.4	0.8		4.8	9.6			3.7	3.4		4.5	4.5
	2.6	2.2		1.2	3.2			-0.1	-1.6		0.6	2.7
	0.2	0.2		0.9	2.3			0.7	0.8		1.6	2.8
				7.5	12.4						8.3	7.9
				3.3	4.7						3.7	3.3
				0.06	1.2						1.9	2.4
data for Fig. 6D							data for Fig. S6B
