# Supplementary material for: Excitatory neurons are more disinhibited than inhibitory neurons by chloride dysregulation in the spinal dorsal horn
Source: eLife. 2019 Nov 19;8:e49753. doi: 10.7554/eLife.49753 (PMC6887484; doi:10.7554/eLife.49753)
Supplement: Figure 7—source data 1. [file elife-49753-fig7-data1.xlsx]

## Sheet: Sheet1
RF center									RF surround
	Adapting				Non-adapting					Adapting				Non-adapting					Adapting				Non-adapting
	baseline	BDNF	ACTZ		baseline	BDNF	ACTZ			baseline	BDNF	ACTZ		baseline	BDNF	ACTZ			baseline	BDNF	ACTZ		baseline	BDNF	ACTZ
Evoked firing rate	3.15	10.05	9.75		7.45	12.1	8.65		Evoked firing rate	0.35	3.6	2.5		1.4	2.4	1.35		spontaneous firing rate	0.4	0	0.3		2.6	3	1.4
(spk/s)	6.75	17.3056	8.6		3	3.7	1.45		(spk/s)	1.55	3.35	0.2		1.7	2.05	0.35		(spk/s)	0.3	0.9	0.9		11.2	17.5	14.9
	22.5	48.1778	28.65		10.6	17.0111	6.95			2.9	4	1.3		1.55	2.9	3			5.4	1.9	1.6		3.2	5.9	0.5
	7.3	8.8333	6.95		1.05	2.65	1.15			0.7	1.7	0.45		1.2	3.6	3.35			0.8	0.4	0.7		10.4	27.9	20.7
	4.85	6.5889	2		2.5	1.9111	0.75			0.1	3.35	1.25		2.75	3.6	1.65			0.7	0.1	0		18.4	20.6667	8.4
	3.15	7.5389	1.9		2.7	9.1833	1.8			0.35	2.8421	1.6842		2.3	5.4	3.9			0.8	0	0.1		5.4	9.9	3.8
	2.7	3.7278	0.6		2.4	3.2667	-0.1			0.6	6.45	2.8		0	2.0526	0.5			0.6	0.4	0.8		5.8	8.6	0.3
	7.8	17.1056	13.45		3.9	5.65	3.55			0.15	2.5789	0.2105		0.05	2.7368	1.4			0.3	0.2	1.2		8.6	9.6	0.7
	0.6	0.95	1		29.15	38.3	32.45			0.65	3.85	0		1.65	14.75	1.1579			0	0	0		0	0	0
	23.55	39.0056	29.65		28.75	33.4	21.55			0.3	2.8947	0.5263		1.85	11	4.1			0.4	1.6	0.5		0	0	0
	1	1.25	2.65		15.85	31.65	24.7			0	5.4211	0.6316		0.1	3.4737	1.55			0	0	0		0	0	0
	1.7	3.9778	1.25		6.15	12.9	14.8			0	0	0		0	0	0			0.9	0.2	0		0	0	0
	0.7	2.15	0.85		6.5	15.6	0.8			0	0	0		0	0	0			1.3	0	0		0	0	0
	16.45	18.25	9.2							0	0	0							0.7	0.5	0.1
	2.95	3.85	1.3							0	0	0							0	0.2	0
	10.05	8.45	9.55							0	0	0							0.3	3.2	0.1
	5.3	4.6	12.55							0	0	0							0	14	0.4
data for Fig. 7A																		data for Fig. 7B
