# Supplementary material for: Excitatory neurons are more disinhibited than inhibitory neurons by chloride dysregulation in the spinal dorsal horn
Source: eLife. 2019 Nov 19;8:e49753. doi: 10.7554/eLife.49753 (PMC6887484; doi:10.7554/eLife.49753)
Supplement: Figure 8—source data 1. [file elife-49753-fig8-data1.xlsx]

## Sheet: Sheet1
ADAPTING UNITS												NON-ADAPTING UNITS
Baselinel>>>	C	C+S	ratio	log(ratio)		KCC2block>>>	C	C+S	ratio	log(ratio)		Baseline>>>	C	C+S	ratio	log(ratio)		KCC2block>>>	C	C+S	ratio	log(ratio)
	8.04762	6	0.745562	-0.127516			18.0737	24.4556	1.3531	0.131331			14.7927	13.7089	0.926733	-0.0330455			14.4579	22.1556	1.53242	0.185378
	10.4286	3.78947	0.363374	-0.439646			4.21053	6.33333	1.50416	0.177295			5.86585	5.6962	0.971078	-0.0127457			6.84737	9.77778	1.42796	0.154717
	7.66667	4.15789	0.542333	-0.265734			7.9	10.1	1.27848	0.106694			23.5063	16.9104	0.719401	-0.143029			40	44.45	1.11125	0.0458118
	3.7224	2.10208	0.564713	-0.248173			4.25	10.75	2.52941	0.40302			7.58333	4.5	0.593407	-0.226647			16.05	26.2	1.6324	0.212826
	4.91708	2.99542	0.609186	-0.21525			5.5	6.1	1.10909	0.0449671			3.18333	2.4625	0.773561	-0.111505			20.05	24.5	1.22195	0.0870517
	6.34583	3.20833	0.505581	-0.296209			5	21.5	4.3	0.633468			12.1542	10.875	0.894755	-0.048296			20.4	32.8	1.60784	0.206244
	11.9292	9.23333	0.774013	-0.111252			5	13.5	2.7	0.431364			1.15	0.50833	0.442026	-0.354552			6.55	13.45	2.05344	0.312481
	15.1	7.27083	0.481512	-0.317393			15.9	59.4	3.73585	0.572389			1.13333	1.11667	0.9853	-0.00643154			3.75	5.45	1.45333	0.162365
	10.9792	4.7375	0.431499	-0.36502			23.05	31.2	1.35358	0.131484			13.6	13.4	0.985294	-0.00643411			26.2	31.2	1.19084	0.0758533
	6.39583	3.55	0.555049	-0.255669			24.25	26.55	1.09485	0.0393528			11.2	9.45	0.84375	-0.0737862			40	44.9	1.1225	0.0501863
	22.6271	16.4563	0.727281	-0.138298			33.05	42.55	1.28744	0.109728			23.35	24.55	1.05139	0.0217646			23	28.85	1.25435	0.098418
	25.7458	14.4208	0.560123	-0.251717			27.8	36.95	1.32914	0.12357			15.15	12.1	0.79868	-0.0976273			5.05	6.2	1.22772	0.0891003
	9.533	5.45	0.571698	-0.242833			12.831	25.065	1.95347	0.290807
	17.0952	15.3158	0.89591	-0.0477358			15.6053	22.3889	1.4347	0.156762
	6.42857	4.52632	0.704094	-0.152369			3.7	5.8	1.56757	0.195226
	4.70125	3.38208	0.719401	-0.143029			4.25	9.15	2.15294	0.333032
	7.58333	4.5	0.593407	-0.226647			3	12.6	4.2	0.623249
	3.18333	2.4625	0.773561	-0.111505			23.95	27.3	1.13987	0.0568571
	12.1542	10.875	0.894755	-0.048296			25	28.85	1.154	0.0622058
	1.15	0.50833	0.442026	-0.354552			12.25	17.2	1.40408	0.147392
	1.6875	0.94167	0.558027	-0.253345			27.75	37.2	1.34054	0.12728
	1.13333	1.11667	0.9853	-0.00643154			11.65	22.65	1.94421	0.288742
	1.5	0.72917	0.486113	-0.313262			12.54	26.5	2.11324	0.324948
data for Fig. 8B
